# Supplementary material
Source: PubMed Central journal article supplement (PMC3466776)
Supplement: bi300646y_si_001.pdf [file bi300646y_si_001.pdf]

|                 | <b>Residues</b> | <b>Sequence</b>                                                                   |
|-----------------|-----------------|-----------------------------------------------------------------------------------|
| <b>AC1-C1b</b>  | 495-522         | IKPAKRMKFKTVCYLLVQLMHCRKMFKA                                                      |
| <b>GST-1C1b</b> | 481-548         | SHRRKIFPGLILSDIKPAKRMKFKTVCYLLVQLMHCRKM<br>FKAEIPFSNVMTCEDDDKRRALRTASEKL          |
| <b>AC8-NT</b>   | 30-54           | GSRPQRLLWQTAVRHITEQRFIHGH                                                         |
| <b>GST-8Nt</b>  | 1-77            | MELSDVHCLSGSEELYTIHPTPPAADGGSGSRPQRLLWQ<br>TAVRHITEQRFIHGHRRGGGGGSRKASNPAGSGPNHHA |
| <b>AC8-C2b</b>  | 1187-1211       | YSLAAVVLGLVQSLNRQRQKQLLNE                                                         |
| <b>GST-8C2b</b> | 1183-1248       | LPGQYSLAAVVLGLVQSLNRQRQKQLLNENSNSGIIKSH<br>YNRRTLLTPSGPEPGAQAEGTDKSDLP            |

**Supplemental Table 1. Sequences of the peptides and GST-fragments.** Peptides (AC1-C1b, AC8-Nt, and AC8-C2b) used for *offline* nano-ESI-MS stopped-flow measurements and GST-fragments (GST-1C1b, GST-8Nt, and GST-8C2b) used for GST pull-down assays are shown. The residues correspond to bovine AC1 and rat AC8.

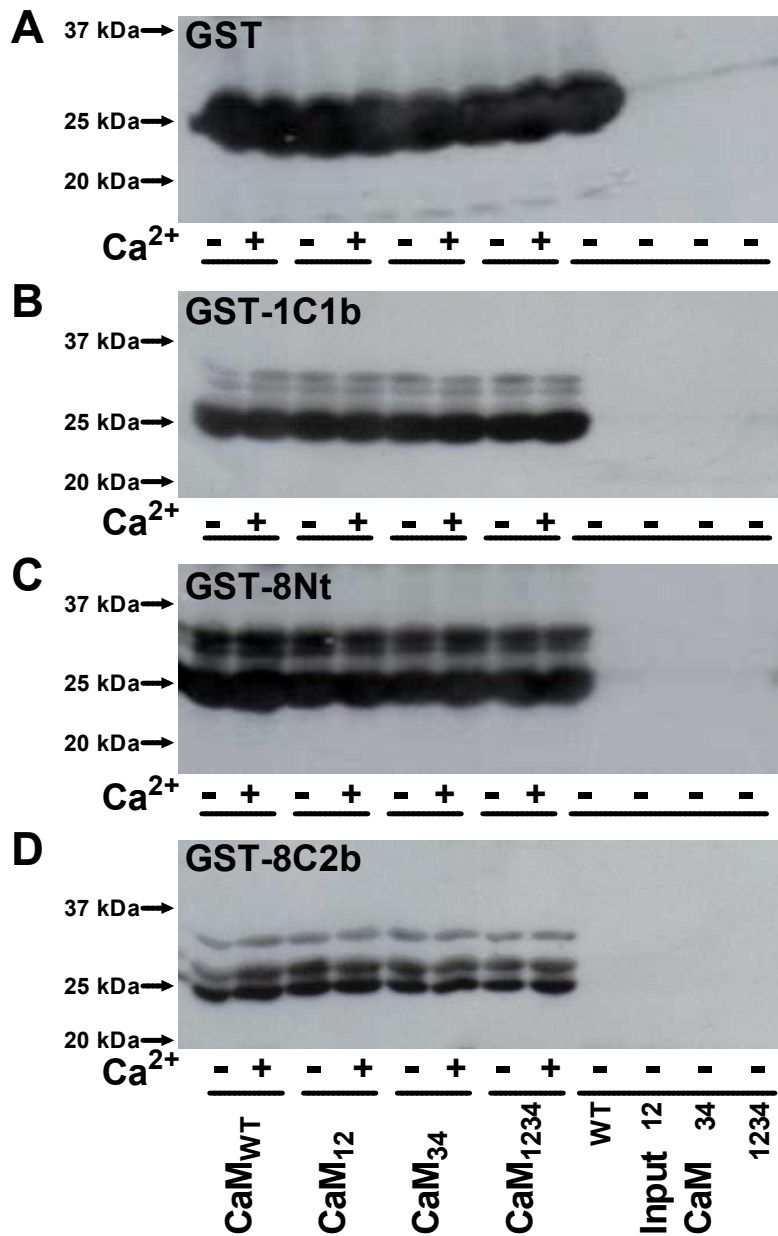

Supplemental Figure 1. GST expression from GST-pull down assay. The membranes from the Fig. 4 was stripped and re-plobed using GST antibody to show the amount of GST used in the assay. The molecular weights of GST (A), GST-1C1b (B), GST-8Nt (C), and GST-8C2b (D) are 26 kDa, 33.3 kDa, 34.5 kDa, and 33.5 kDa, respectively.

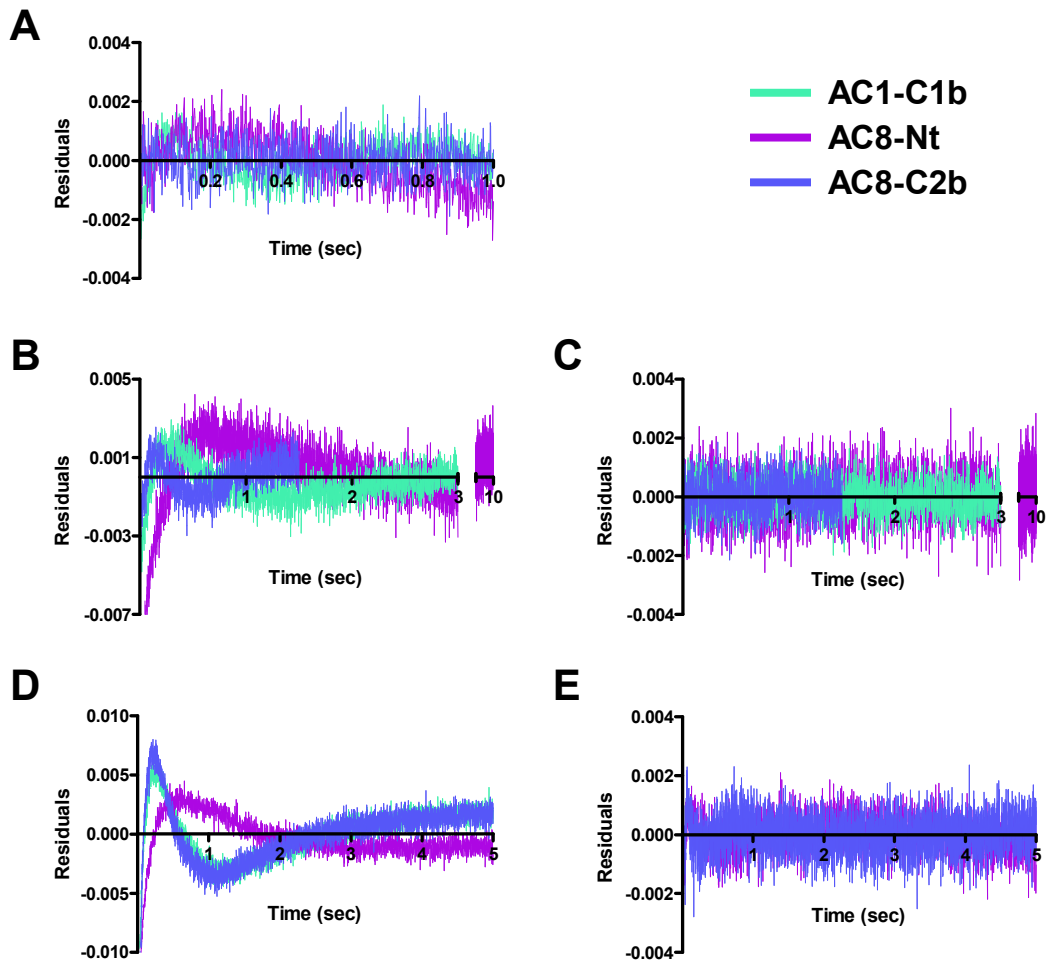

Supplemental Figure 2. Residuals from the fit of  $\text{Ca}^{2+}$  dissociation from CaM. Residuals from a single-exponential fit (A, B, and D) or a double-exponential fit (C and E) of  $\text{Ca}^{2+}$  dissociation from CaM34 (A) from Fig. 6A, CaM12 (B and C) from Fig. 6B, or CaMWT (D and E) from Fig. 7A are shown.

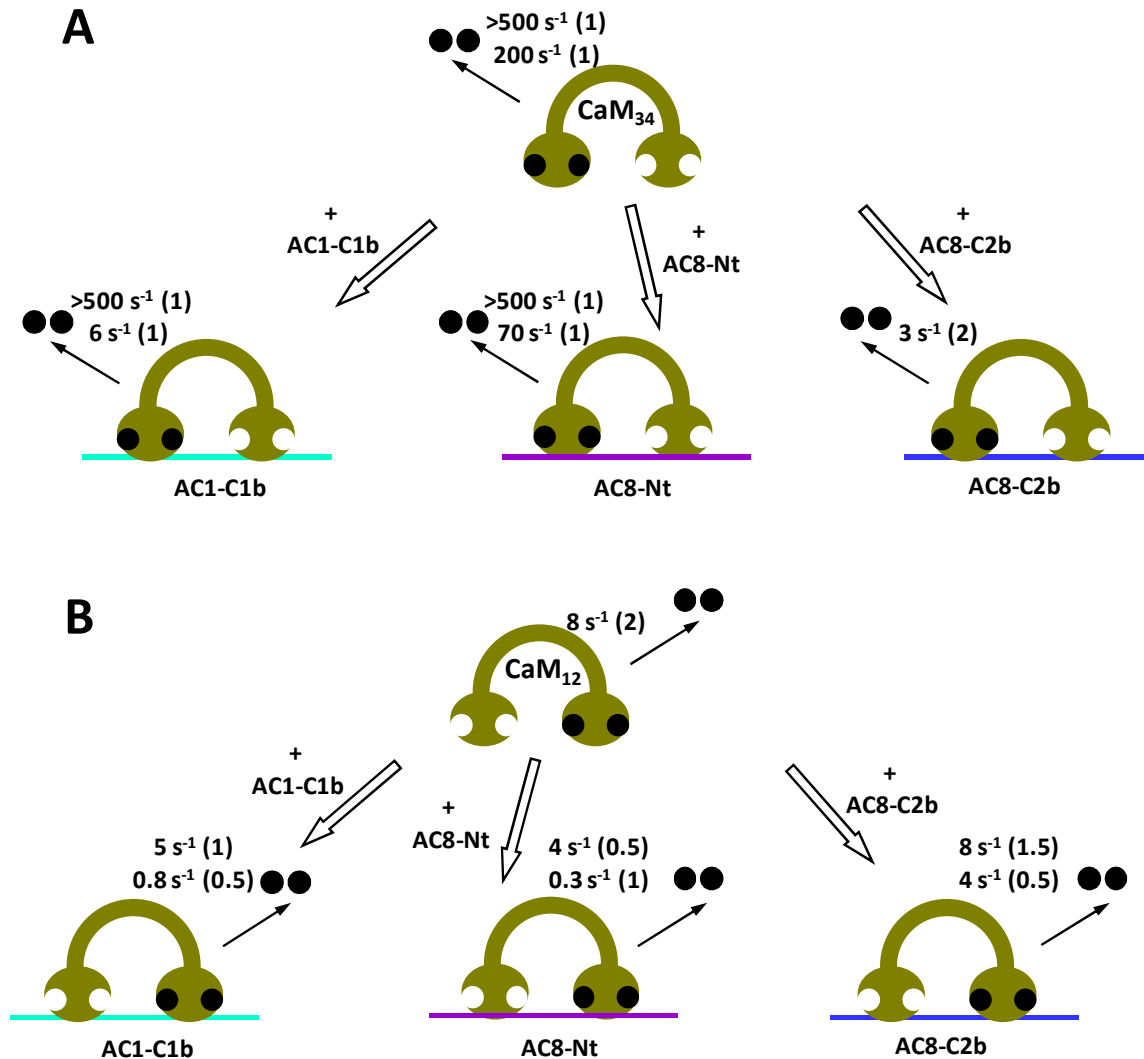

Supplemental Figure 3. Summary showing the effect of AC1-C1b, AC8-Nt, and AC8-C2b on the rate constants for Ca<sup>2+</sup> dissociation from CaM mutants. A, Ca<sup>2+</sup> dissociates from the N-lobe of peptide-free CaM<sub>34</sub> with a rate constant of >500 s<sup>-1</sup> and 200 s<sup>-1</sup>. When CaM<sub>34</sub> binds to AC1-C1b, the Ca<sup>2+</sup>-dissociation rate from one EF-hand of the N-lobe is decreased to 6 s<sup>-1</sup>, without affecting the rate of other EF-hand. Ca<sup>2+</sup> release from CaM<sub>34</sub> is still very fast in the presence of AC8-Nt. The rate constant for Ca<sup>2+</sup> dissociation is dramatically reduced when CaM<sub>34</sub> is in complex with AC8-C2b, to 3 s<sup>-1</sup>. B, Ca<sup>2+</sup> dissociates from the C-lobe of peptide-free CaM<sub>12</sub> with a rate constant of 8 s<sup>-1</sup>. When CaM<sub>12</sub> binds to AC1-C1b, the Ca<sup>2+</sup>-dissociation rate from

one EF-hand of the C-lobe is decreased to  $0.8 \text{ s}^{-1}$ , without affecting the rate of other EF-hand considerably. The rate constant for  $\text{Ca}^{2+}$  dissociation is dramatically reduced when CaM12 is in complex with AC8-Nt, to  $4 \text{ s}^{-1}$  and  $0.3 \text{ s}^{-1}$ .  $\text{Ca}^{2+}$  release from CaM12 is hardly influenced in the presence of AC8-C2b.
